# Supplementary material for: Integrating evolutionary dynamics into treatment of metastatic castrate-resistant prostate cancer
Source: PubMed Central journal article supplement (PMC5703947; doi:10.1038/s41467-017-01968-5), 2017-11-28
Supplement: 41467_2017_1968_MOESM1_ESM.pdf [file 41467_2017_1968_MOESM1_ESM.pdf]

|           | ESS's $k_i=25000$ |     |     | ESS's $k_i = [1.5*TP, 10000, 10000]$ |     |     |
|-----------|-------------------|-----|-----|--------------------------------------|-----|-----|
|           | T+                | TP  | T-  | T+                                   | TP  | T-  |
| <b>9</b>  | 55%               | 45% | 0%  | 50%                                  | 50% | 0%  |
| <b>10</b> | 55%               | 45% | 0%  | 50%                                  | 50% | 0%  |
| <b>15</b> | 55%               | 45% | 0%  | 50%                                  | 50% | 0%  |
| <b>16</b> | 45%               | 55% | 0%  | 50%                                  | 50% | 0%  |
| <b>22</b> | 45%               | 55% | 0%  | 44%                                  | 56% | 0%  |
| <b>13</b> | 45%               | 55% | 0%  | 47%                                  | 53% | 0%  |
| <b>14</b> | 40%               | 60% | 0%  | 47%                                  | 53% | 0%  |
| <b>21</b> | 40%               | 60% | 0%  | 47%                                  | 53% | 0%  |
| <b>7</b>  | 33%               | 66% | 0%  | 52%                                  | 48% | 0%  |
| <b>8</b>  | 55%               | 45% | 0%  | 52%                                  | 48% | 0%  |
| <b>20</b> | 45%               | 55% | 0%  | 52%                                  | 48% | 0%  |
| <b>19</b> | 40%               | 60% | 0%  | 52%                                  | 48% | 0%  |
| <b>12</b> | 37%               | 57% | 7%  | 48%                                  | 50% | 2%  |
| <b>5</b>  | 41%               | 52% | 7%  | 45%                                  | 52% | 3%  |
| <b>2</b>  | 29%               | 63% | 9%  | 41%                                  | 55% | 3%  |
| <b>6</b>  | 45%               | 42% | 13% | 38%                                  | 55% | 7%  |
| <b>18</b> | 20%               | 63% | 17% | 33%                                  | 47% | 20% |
| <b>1</b>  | 25%               | 50% | 25% | 25%                                  | 54% | 21% |
| <b>4</b>  | 17%               | 58% | 25% | 22%                                  | 51% | 27% |
| <b>3</b>  | 28%               | 40% | 32% | 0%                                   | 40% | 60% |
| <b>11</b> | 33%               | 33% | 33% | 0%                                   | 40% | 60% |
| <b>17</b> | 17%               | 37% | 47% | 0%                                   | 40% | 60% |

**Supplementary Table 1:** Sensitivity analysis of carrying capacities.  $k = [1.5 * TP, \phi, \phi]$  where  $\phi$  can be any value results in the same ESS's. A more detailed analysis of simulation sensitivity analysis in Li et al.

|           | $\alpha = [0.1 \ 0.2 \ 0.3 \ 0.4 \ 0.5 \ 0.6]$ |     |     | $\alpha = [0.0 \ 0.2 \ 0.4 \ 0.6 \ 0.8 \ 1.0]$ |     |     |
|-----------|------------------------------------------------|-----|-----|------------------------------------------------|-----|-----|
|           | T+                                             | TP  | T-  | T+                                             | TP  | T-  |
| <b>9</b>  | 52%                                            | 45% | 3%  | 52%                                            | 48% | 0%  |
| <b>10</b> | 55%                                            | 45% | 0%  | 52%                                            | 48% | 0%  |
| <b>15</b> | 56%                                            | 43% | 1%  | 57%                                            | 43% | 0%  |
| <b>16</b> | 57%                                            | 43% | 0%  | 57%                                            | 43% | 0%  |
| <b>22</b> | 58%                                            | 42% | 0%  | 60%                                            | 40% | 0%  |
| <b>13</b> | 48%                                            | 41% | 11% | 57%                                            | 43% | 0%  |
| <b>14</b> | 49%                                            | 42% | 9%  | 57%                                            | 43% | 0%  |
| <b>21</b> | 52%                                            | 40% | 8%  | 60%                                            | 40% | 0%  |
| <b>7</b>  | 44%                                            | 45% | 12% | 47%                                            | 53% | 0%  |
| <b>8</b>  | 46%                                            | 44% | 10% | 52%                                            | 48% | 0%  |
| <b>20</b> | 46%                                            | 39% | 15% | 60%                                            | 40% | 0%  |
| <b>19</b> | 44%                                            | 38% | 18% | 43%                                            | 29% | 29% |
| <b>12</b> | 40%                                            | 40% | 20% | 57%                                            | 43% | 0%  |
| <b>5</b>  | 39%                                            | 41% | 21% | 52%                                            | 48% | 0%  |
| <b>2</b>  | 38%                                            | 43% | 19% | 47%                                            | 53% | 0%  |
| <b>6</b>  | 38%                                            | 44% | 18% | 47%                                            | 53% | 0%  |
| <b>18</b> | 38%                                            | 37% | 25% | 60%                                            | 40% | 0%  |
| <b>1</b>  | 31%                                            | 43% | 26% | 44%                                            | 53% | 3%  |
| <b>4</b>  | 31%                                            | 40% | 28% | 51%                                            | 48% | 1%  |
| <b>3</b>  | 21%                                            | 38% | 41% | 0%                                             | 33% | 67% |
| <b>11</b> | 29%                                            | 38% | 34% | 0%                                             | 33% | 67% |
| <b>17</b> | 27%                                            | 35% | 37% | 0%                                             | 33% | 67% |

**Supplementary Table 2:** Effect of varying values of  $\alpha_{ij}$  on variance and coexistence of ESS's.

|           | Time to Progression 5% T- |            |          | Time To Progression 90% T- |            |          |
|-----------|---------------------------|------------|----------|----------------------------|------------|----------|
|           | MTD                       | Metronomic | Adaptive | MTD                        | Metronomic | Adaptive |
| <b>9</b>  | ---                       | ---        | ---      | ---                        | ---        | ---      |
| <b>10</b> | ---                       | ---        | ---      | ---                        | ---        | ---      |
| <b>15</b> | ---                       | ---        | ---      | ---                        | ---        | ---      |
| <b>16</b> | ---                       | ---        | ---      | ---                        | ---        | ---      |
| <b>22</b> | ---                       | ---        | ---      | ---                        | ---        | ---      |
| <b>13</b> | 6361                      | 6898       | ---      | 7005                       | 7765       | ---      |
| <b>14</b> | 6254                      | 6828       | ---      | 6908                       | 7750       | ---      |
| <b>21</b> | 7069                      | 7760       | ---      | 7718                       | 8717       | ---      |
| <b>7</b>  | 3950                      | 4556       | 8557     | 4621                       | 4950       | ---      |
| <b>8</b>  | 4378                      | 4832       | 9141     | 5047                       | 5757       | ---      |
| <b>20</b> | 902                       | 902        | 2046     | 1456                       | 1456       | 3132     |
| <b>19</b> | 759                       | 759        | 915      | 1036                       | 1036       | 2029     |
| <b>12</b> | 673                       | 673        | 673      | 802                        | 802        | 4126     |
| <b>5</b>  | 323                       | 323        | 323      | 784                        | 784        | ---      |
| <b>2</b>  | 161                       | 161        | 161      | 759                        | 759        | 1888     |
| <b>6</b>  | 1                         | 1          | 1        | 679                        | 679        | 1596     |
| <b>18</b> | 1                         | 1          | 1        | 560                        | 560        | 560      |
| <b>1</b>  | 1                         | 1          | 1        | 532                        | 532        | 532      |
| <b>4</b>  | 1                         | 1          | 1        | 501                        | 501        | 501      |
| <b>3</b>  | 1                         | 1          | 1        | 334                        | 334        | 334      |
| <b>11</b> | 1                         | 1          | 1        | 334                        | 334        | 334      |
| <b>17</b> | 1                         | 1          | 1        | 334                        | 334        | 334      |

**Supplementary Table 3:** Time to progression analysis for the three treatment regimens on all 22 possible tumor initial conditions. Representative patient #1 corresponds to **7** and representative patients #2 corresponds to **5** (highlighted). It can be seen that that non-responders category at the bottom shows no difference in time to progression for any treatments. In all other initial conditions the adaptive therapy regimen provides equivalent or longer times to progression.
